# Supplementary material for: Photobehaviour of methyl-pyridinium and quinolinium iodide derivatives, free and complexed with DNA. A case of bisintercalation
Source: Royal Society of Chemistry journal article supplement (doi:10.1039/c4pp00023d), 2014-03-25
Supplement: c4pp00023d1.pdf [file c4pp00023d1.pdf]

## Photobehaviour of methyl-pyridium and quinolinium iodides derivatives, free and complexed with DNA. A case of bisintercalation.

Alessandra Mazzoli,<sup>a</sup> Benedetta Carlotti,<sup>a</sup> Giuseppe Consiglio,<sup>b</sup> Cosimo G. Fortuna,<sup>b</sup> Giorgia Miolo,<sup>c</sup> Anna Spalletti<sup>a\*</sup>

<sup>a</sup>Department of Chemistry, University of Perugia, via Elce di Sotto 8, 06123 Perugia, Italy

<sup>b</sup>Department of Chemical Sciences, University of Catania, 95125 Catania, Italy.

<sup>c</sup>Department of Pharmaceutical and Pharmacological Sciences, University of Padova, Via Marzolo 5, 35131 Padova Italy

\*E-mail: [anna.spalletti@unipg.it](mailto:anna.spalletti@unipg.it)

**Electronic Supplementary Information:** computational results, decay kinetics by pump probe absorption spectroscopy plots to determine binding constants by absorption and fluorimetric titrations and linear dichroic signals..

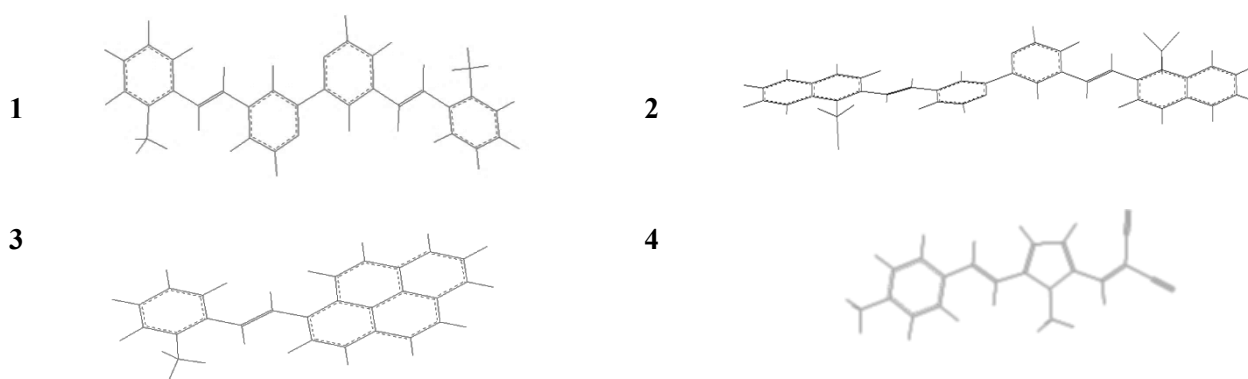

**Scheme ESI 1-** A conformers of compounds 1-4.

| $\lambda$ (nm) | f    | configuration                              | coeff.      |
|----------------|------|--------------------------------------------|-------------|
| 355            | 2.80 | H-1 $\rightarrow$ L+1, H-2 $\rightarrow$ L | 0.47, -0.47 |
| 313            | 0.16 | H $\rightarrow$ L                          | 0.59        |
| 262            | 0.82 |                                            |             |

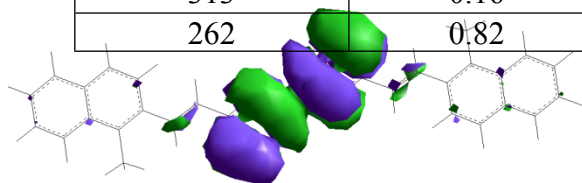

HOMO

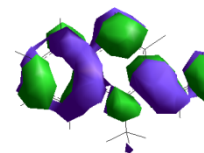

LUMO

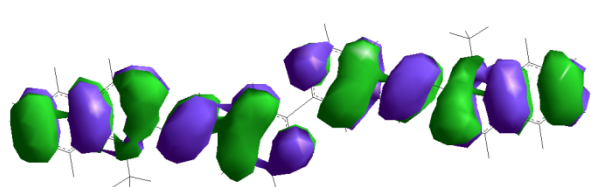

HOMO - 1

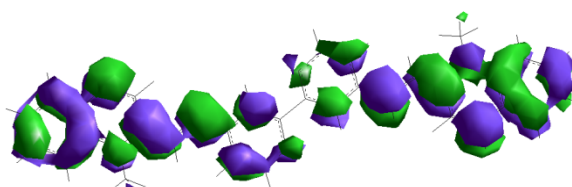

LUMO + 1

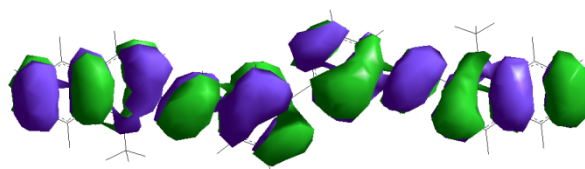

HOMO -2

**Figure ESI 1-** Molecular orbitals of compound **2** as derived by ZINDO/S method. Inserted table: the HOMO-1 –LUMO+1 and HOMO-2 - LUMO configurations contribute to the main electronic transition with high coefficients.

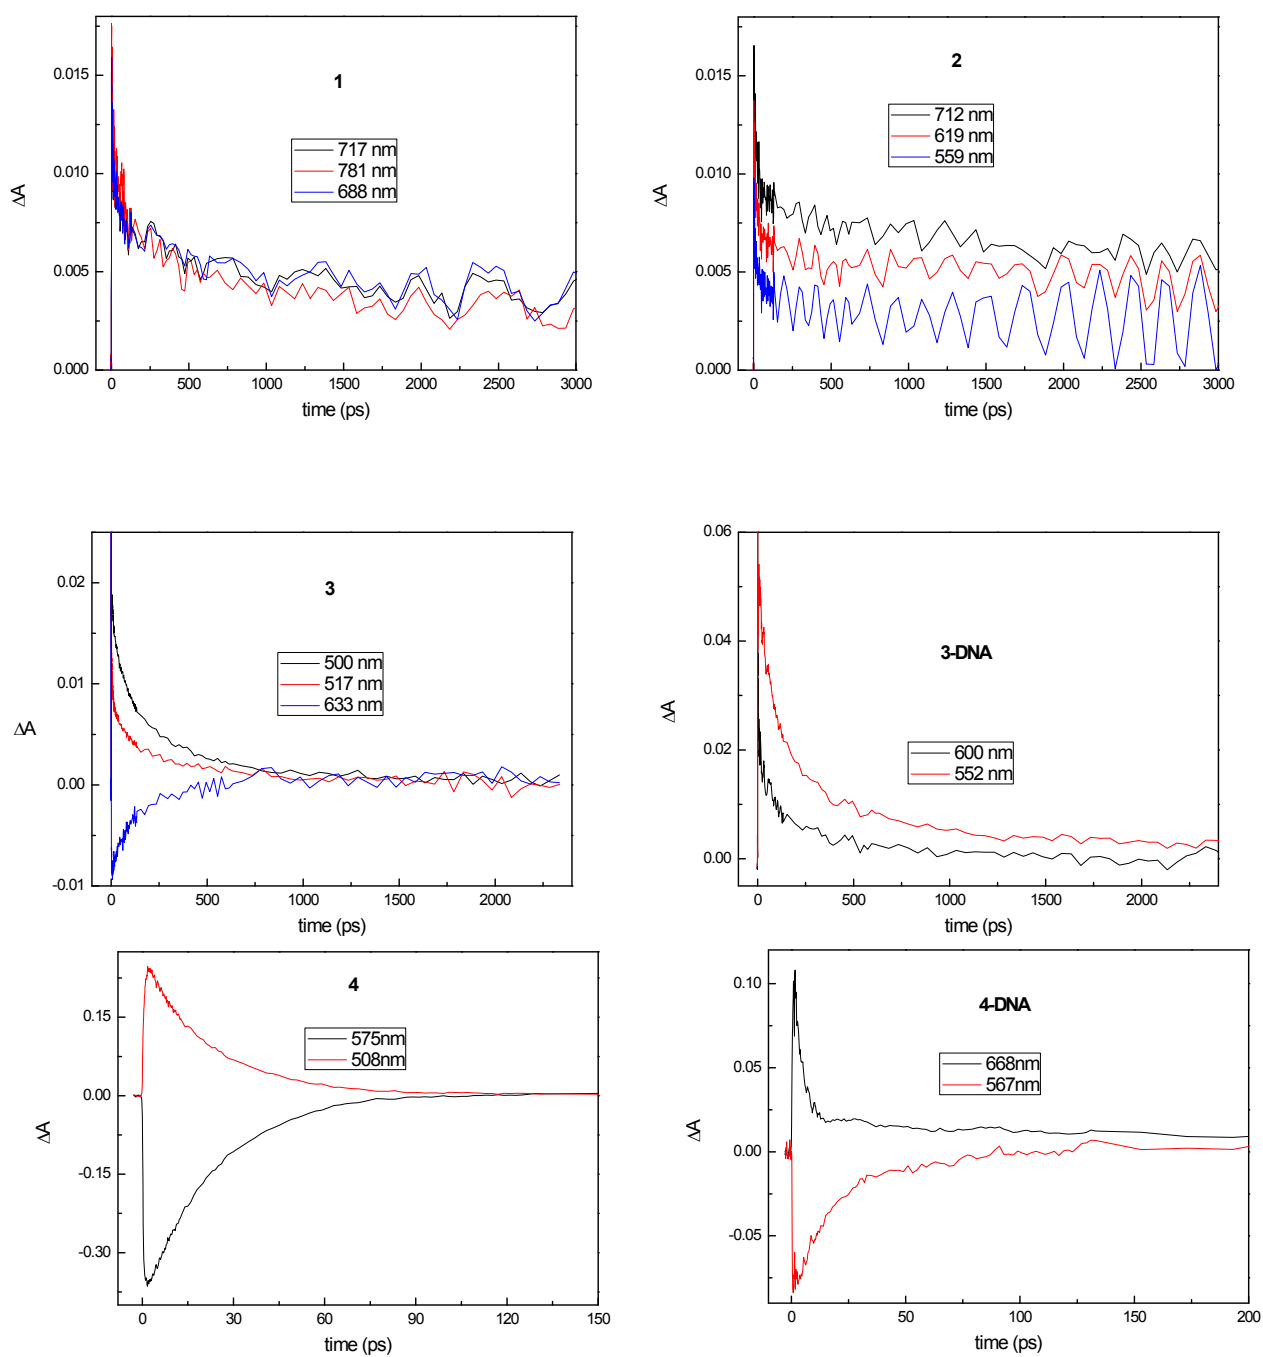

**Figure ESI 2-** Decay kinetics by pump probe absorption spectroscopy of compounds **1-4** and complexes **3-DNA** and **4-DNA** in W (Insets of Figure 3).

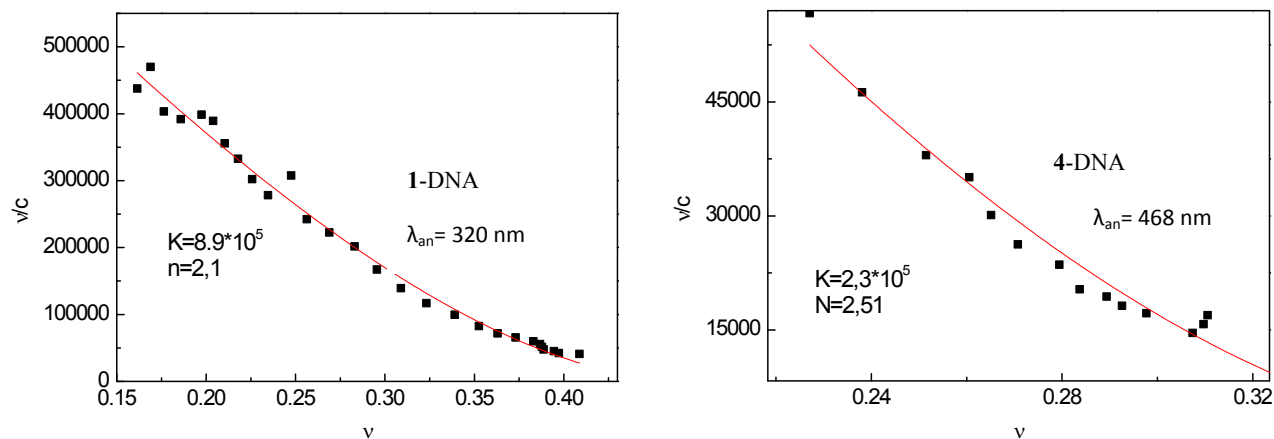

**Figure ESI 3-** McGhee von Hippel plots to determine binding constants from spectrophotometric titrations according to eq. 1, for complexes **1-DNA** and **4-DNA** in W (Insets of Figure 4).

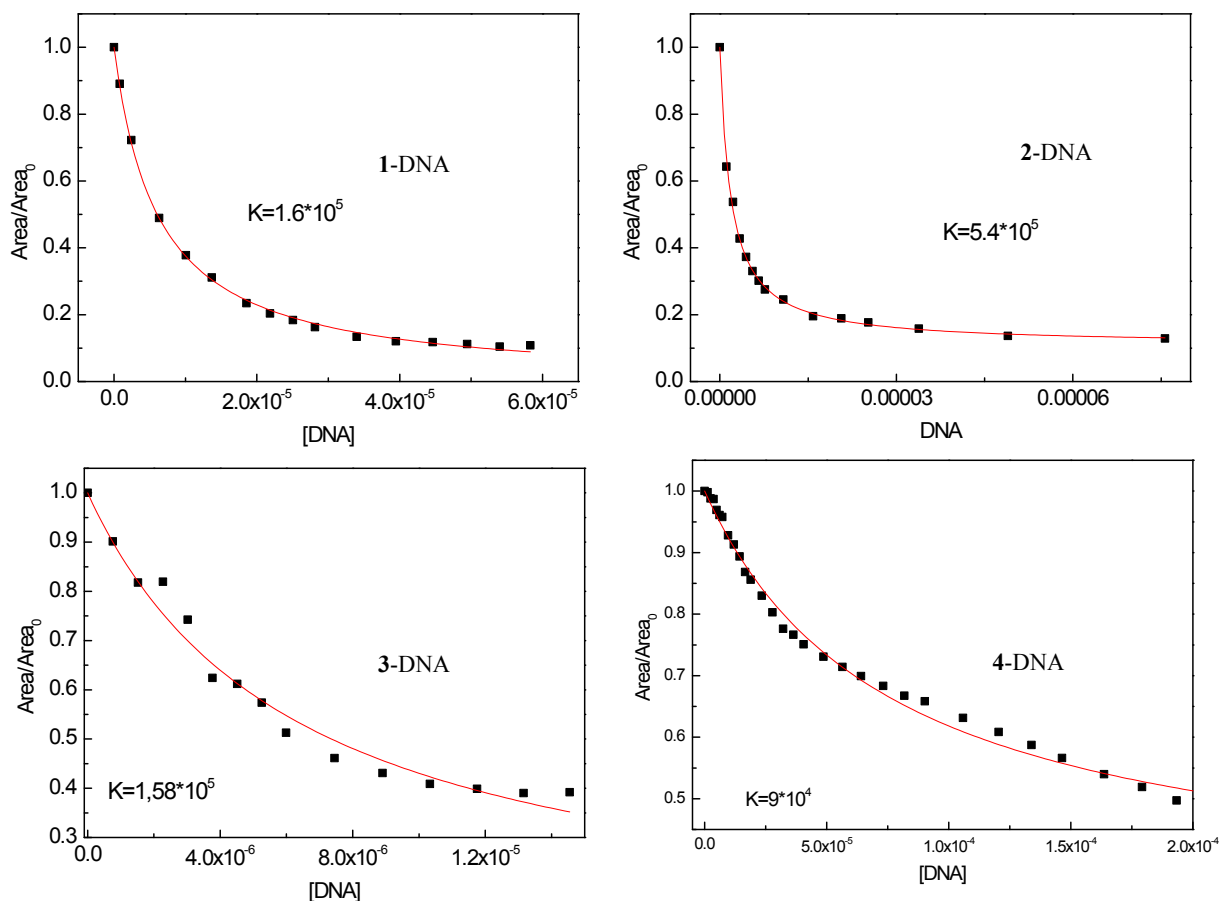

**Figure ESI 4-** Stern-Volmer plots to determine binding constants from fluorimetric titrations according to eq. 2, for complexes **1,2,3,4-DNA** in W (Insets of Figure 5).

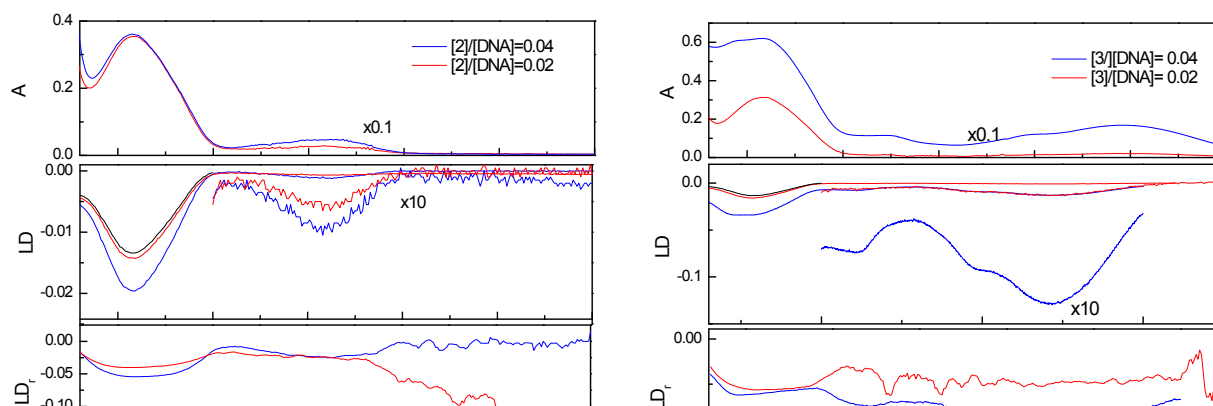

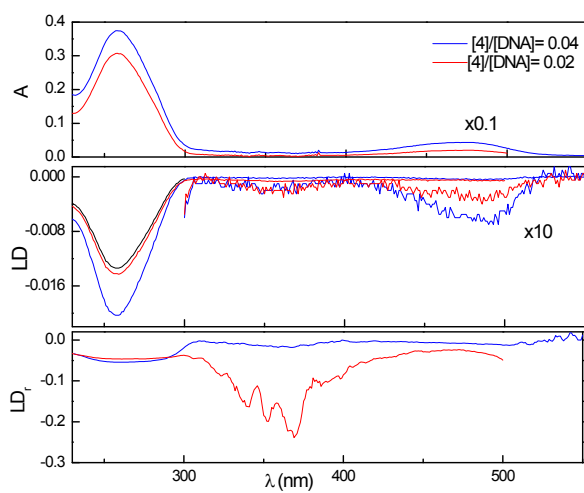

**Figure ESI 5-** Absorption LD and LD<sub>r</sub> signals of compounds **2-4** with [ligand]/[DNA] ratio of 0.04 and 0.02.
